1 **Advancing Research on Mechanisms of Resilience (ARMOR) Prospective Longitudinal Study of**  
2 **Adaptation in Young Military Recruits: Protocol and rationale for methods and measures**

3  
4  
5  
6 Melissa A. Polusny, PhD<sup>1,2,3</sup>, Craig A. Marquardt, PhD<sup>1,3</sup>, Shelly Hubbling<sup>1,3</sup>, Emily Hagel  
7 Campbell<sup>1,2</sup>, Paul A. Arbisi, PhD<sup>1,3,4</sup>, Nicholas D. Davenport, PhD<sup>1,3</sup>, Kelvin O. Lim, MD<sup>1,3</sup>, Shumel  
8 Lissek<sup>4</sup>, PhD, Jonathan D. Schaefer, PhD<sup>5</sup>, Scott R. Sponheim, PhD<sup>1,3,4</sup>, Ann S. Masten, PhD<sup>5</sup>, and  
9 Siamak Noorbaloochi, PhD<sup>1,2,6</sup>

- 10  
11 1. Minneapolis VA Health Care System, Minneapolis, MN;  
12 2. Center for Care Delivery Outcomes Research, Minneapolis, MN;  
13 3. Department of Psychiatry and Behavioral Sciences, University of Minnesota Medical  
14 School  
15 4. Department of Psychology, University of Minnesota, Minneapolis, MN  
16 5. Institute of Child Development, University of Minnesota, Minneapolis, MN  
17 6. Department of Medicine, University of Minnesota Medical School  
18

19 **Author Note**

20 Correspondence concerning this article should be addressed to Melissa Polusny, PhD,  
21 Minneapolis VA Medical Center, One Veterans Drive (B68-2), Minneapolis, MN 55417. Email:  
22 [melissa.polusny@va.gov](mailto:melissa.polusny@va.gov). Office Phone: (612) 467-3965; Cell Phone: (612) 910-7075.  
23 Melissa A. Polusny <https://orcid.org/0000-0002-4932-305X>

24  
25  
26 References: 82

27 Tables: 5

28 Figures: 2

29 Appendices: 0

30 Abstract word count: 386 (word limit 450)

31 Article text word count: 6,057

32 Trial registry number: n/a

33 **Funding Source:** National Center for Complementary and Integrative Health of the National  
34 Institutes of Health  
35

## 36 **Abstract**

37 **Background:** Military service provides a unique opportunity for studying resilience, a dynamic  
38 process of successful adaptation (i.e., doing well in terms of functioning and symptoms) in  
39 response to significant adversity. Despite tremendous interest in positive adaptation among  
40 military service members, little is known about the processes underlying their resilience.  
41 Understanding neurobiological, cognitive, and social mechanisms underlying adaptive  
42 functioning following military stressor exposure is essential to enhance the resilience of military  
43 service members.

44 **Objectives:** The primary objective of the Advancing Research on Mechanisms of Resilience  
45 (ARMOR) longitudinal study is to characterize trajectories of positive adaptation among young  
46 military recruits in response to Basic Combat Training (BCT), a well-defined, uniform, 10-week  
47 period of intense stress (Aim 1) and identify promotive and protective processes contributing to  
48 individual variations in resilience (Aim 2). The secondary objective is to investigate pathways by  
49 which neurobehavioral markers of self-regulation assessed by electroencephalography (EEG)  
50 and magnetic resonance imaging (MRI) contribute to adaptive trajectories (Aim 3).

51 **Methods:** ARMOR is an ongoing, prospective longitudinal cohort study of young military recruits  
52 who recently joined the National Guard but have not yet shipped for BCT. Participants (N=1,201)  
53 are assessed at five timepoints over the initial 2+ years of military service beginning before BCT  
54 (baseline) and followed up at 2 weeks, 6, 12, and 18 months post-BCT. At each time point,  
55 participants complete online questionnaires assessing vulnerability and protective factors,  
56 mental health and social-emotional functioning, and, at Time 0 only, a battery of neurocognitive  
57 tests. A subset of participants also complete structured diagnostic interviews, additional self-

58 report measures, and perform neurobehavioral tasks before and after BCT during EEG sessions,  
59 and, at pre-BCT only, during MRI sessions.

60 **Results:** Study enrollment began April 14, 2019 and ended in October 16, 2021. A total of 1,201  
61 participants are enrolled in the study (68.9% male; mean age = 18.9, SD = 3.0). Follow-up data-  
62 collection is ongoing and projected to continue through March 2024. We will disseminate  
63 findings through conferences, webinars, open access publications, and communications with  
64 participants and stakeholders.

65 **Conclusions:** Results are expected to elucidate how young military recruits adapt to military  
66 stressors during the initial years of military service. Understanding positive adaptation of military  
67 recruits in the face of BCT has implications for developing prevention and intervention strategies  
68 to enhance resilience of military trainees and potentially other young people facing significant  
69 life challenges.

70  
71 *Keywords:* study protocol, military personnel, longitudinal studies, resilience, adaptive behavior,  
72 stress, adversity, mechanisms, protective factors

73

74

75

## 76 Introduction

77           Across the military career life cycle, service members are at considerable risk for  
78 exposure to stressors that may impact their health, well-being, and performance.<sup>1-3</sup> Extensive  
79 research has identified factors that contribute to risk for psychopathology (e.g., post-traumatic  
80 stress symptoms, depression) following combat exposure and other military-related stressors.  
81 However, mounting evidence suggests that the majority of individuals show resilience, adapting  
82 successfully to risk and adversity.<sup>4-8</sup> Understanding the neurobiological, cognitive, and social  
83 mechanisms underlying successful adaptation following military stressor exposure is essential  
84 to designing prevention and intervention strategies to enhance resilience for military  
85 populations.<sup>9</sup> However, the mechanisms and processes that facilitate resilience following  
86 military stress remain poorly understood.

87           Most studies on resilience within the military context have operationalized resilience as  
88 a static, trait-like attribute or have relied on cross-sectional designs.<sup>10</sup> One-time assessments of  
89 adaptation, adversity exposure, and resilience, particularly through self-report questionnaires,  
90 provide very limited insights into risk and protective processes and their influence on later  
91 mental health outcomes. There is now growing consensus that resilience is a multidimensional  
92 and dynamic process that unfolds over time in response to a challenge.<sup>11-14</sup> We define  
93 resilience as the capability of a system to adapt successfully through multiple processes to  
94 challenges that threaten system function.<sup>12</sup> Additionally, the resilience of an individual person  
95 draws on support from systems beyond the individual, including supportive relationships, such  
96 as battle buddies or unit support.<sup>15,16</sup> Variations in the nature and timing of adversity exposure  
97 also influence how individuals adapt, and it is ideal to have assessments of adaptive functioning

98 before, during, and following exposure to well-described uniform stressors. BCT provides a  
99 systematic and relatively uniform challenge with known timing, so that assessments of  
100 adversity, potential vulnerabilities, and protective influences, as well as adaptive functioning  
101 can be obtained before, during, and following a well-described period of challenge. Therefore,  
102 our approach to operationalizing resilience calls for a prospective, longitudinal study design  
103 that tracks the adaptation of military service members (MSMs) over time with assessments  
104 before and following BCT and related, well-defined challenges.

105         A growing body of longitudinal research with military populations has identified distinct  
106 latent classes (groupings) of service members demonstrating similar trajectories of adaptation  
107 over time.<sup>5,17,18</sup> This literature suggests there is significant heterogeneity in people's response  
108 to comparable stressors. However, these studies have generally examined trajectories following  
109 deployment and across the transition from military to civilian life.<sup>19,20</sup> Little research has  
110 focused on young military recruits beginning at the outset of their military careers. During the  
111 initial years of military service, recruits are faced with numerous challenges (e.g., moving away  
112 from home, separation from family/friends, dramatic changes in living environment, and  
113 intense military training) as they are enculturated into military life. Moreover, for most recruits,  
114 this transition from civilian to military life occurs within the context of also transitioning from  
115 adolescence to emerging adulthood.<sup>21</sup> Identifying potential contributing factors linked to risk  
116 and resilience early in military service may be particularly useful in effectively intervening with  
117 service members during this key developmental transition. Longitudinal studies have also  
118 examined a limited number of outcomes in isolation (e.g., PTSD, depression, alcohol use). Our  
119 conceptualization of resilience as a multidimensional process, in which a person may show

120 successful adaptation within some domains, but not others,<sup>22</sup> calls for research that assesses  
121 multiple outcome domains (e.g., internalizing symptoms, externalizing problems, social-  
122 occupational functioning) over time. Finally, prior research has investigated the role of  
123 demographic characteristics (e.g., age, gender), psychological factors (e.g., neuroticism, self-  
124 efficacy), and environmental factors (e.g., social support, subsequent life stressors) in  
125 differentiating individuals who manifest resilience from those who exhibit maladaptive  
126 trajectories.<sup>5,19,20</sup> Few studies have integrated neurobehavioral paradigms into longitudinal  
127 cohort studies,<sup>17,23</sup> so the neurobiological, cognitive, and/or behavioral processes contributing  
128 to trajectory membership remains largely unknown.

129 Drawing on the above literature, the ARMOR study was established at the Minneapolis  
130 Veterans Affairs Health Care System (MVAHCS) and the University of Minnesota-Twin Cities  
131 (UMN).<sup>24</sup> The overarching goal of this prospective, longitudinal cohort study with an embedded  
132 laboratory sub-study is to develop a comprehensive, multilevel model of resilience to guide the  
133 development of prevention and intervention strategies for military trainees and potentially  
134 other young people facing significant life challenges.

135 **Figure 1** presents the basic conceptual model guiding the study.<sup>25</sup> It recognizes that  
136 individuals are embedded within a complex system of risk and protective factors that span  
137 multiple levels from individual neurobiological and behavioral factors to social and broader  
138 environmental factors. This multisystemic perspective acknowledges the dynamic and  
139 reciprocal relationships among these influences and their joint impact on resilience.<sup>26</sup> The  
140 model also emphasizes potential pathways to risk and resilience in the face of adversity (shown  
141 as blue and red lines in response to BCT). Challenging life experiences past and present,

142 including childhood adversity or trauma and exposure to military training, can heighten the risk  
143 of developing psychopathology. As illustrated by the dotted line in Figure 1, promotive factors,  
144 such as cognitive ability and social support, directly contribute to positive adaptation regardless  
145 of risk level. The dashed line in Figure 1 illustrates how protective factors can act as buffers  
146 against the detrimental effects of adversity. In the ARMOR study, the focus is on investigating  
147 self-regulation as a key protective process contributing to resilience.

148         Self-regulation is comprised of three distinct but interrelated neurocognitive processes  
149 involving affect, behavior, and cognition, which together can facilitate adaptive responding to  
150 adversity.<sup>27</sup> Attentional control involves the ability to concentrate and sustain attention despite  
151 distractions, inhibitory control refers to the regulation of maladaptive behavior in favor of goal  
152 directed actions, and behavioral flexibility enables the adaptation of behavioral strategies to  
153 meet environmental demands. Previous studies employing laboratory-based paradigms have  
154 identified significant associations between these self-regulatory processes and measures of  
155 trait resilience, implying their potential as stress-buffering mechanisms.<sup>28</sup> However, few studies  
156 have examined neurobiological, cognitive, and/or behavioral processes in relation to resilience  
157 trajectory membership.<sup>4</sup>

## 158 **Study aims**

159         The primary objective of the ARMOR study is to characterize trajectories of adaptation  
160 among young military recruits in response to BCT over the first two years of military service  
161 (Aim 1) and identify promotive factors and protective processes contributing to individual  
162 variations in adaptation (Aim 2). The secondary objective is to investigate whether

163 neurobehavioral markers of self-regulation are predictive of resilient/non-resilient trajectories  
164 (Aim 3).

165 **Fig. 1.** Integrated Multilevel Model of Resilience for Military Service Members

166 *Note.* Conceptual model of resilience as a dynamic process in response to the challenges of  
167 Basic Combat Training (BCT). Risk and protective factors across multiple levels (individual,  
168 social, and environmental) are depicted in the box on the left. Promotive and protective  
169 pathways are depicted with dashed and dotted lines, respectively. Positive (blue) and negative  
170 (red) responses to the challenges of BCT are shown in the graphs in the box on the right. From  
171 “A dynamic, multilevel approach to conceptualising and designing resilience research in the  
172 context of military stress,” MA, Polusny and CR, Erbes, 2023, *Stress & Health*, used under  
173 Creative Commons CC-BU license.

## 174 **Methods**

### 175 **Study design**

176 ARMOR is a prospective, longitudinal cohort study of young military recruits, including  
177 those who are age 17 at study entry, that investigates mechanisms contributing to manifested  
178 resilience across multiple levels of analysis (neural, cognitive, behavioral, and social). The study  
179 includes two components: (a) an online longitudinal survey component, including self-report  
180 measures presented via Qualtrics and neurocognitive tests using the Penn Computerized  
181 Neurocognitive Battery, and (b) a laboratory sub-study component, consisting of clinical  
182 diagnostic interviews, additional self-report questionnaires, and a series of performance-based  
183 tasks involving electroencephalography (EEG) and magnetic resonance imaging (MRI)



184 assessments. We aimed to enroll a cohort of at least 1,200 young military recruits who recently  
185 enlisted in the Minnesota Army National Guard (MNARNG). Subject recruitment began on  
186 4/14/2019 and ended on 10/16/2021. Data collection is ongoing and is expected to continue  
187 into 2024. As shown in **Figure 2**, participants are assessed at baseline (T0) before exposure to a  
188 uniform military challenge (BCT) and are currently being followed up at four time points (study  
189 is ongoing): two weeks following return from BCT (T1) and at six months (T2), 12 months (T3),  
190 and 18 months (T4) post-BCT. A subset of participants from the longitudinal cohort (n = 123)  
191 completed the laboratory sub-study procedures prior to shipping to BCT (pre-BCT) and after  
192 returning from training (post-BCT).

## 193 **Ethical considerations**

194 This study has been approved by the Institutional Review Boards of the University of  
195 Minnesota (STUDY00004470) and Minneapolis VA Health Care System (VAM-18-  
196 00334/1594664). All study procedures were also approved by the relevant military command.

197 All participants provided informed consent. Participants were provided with a letter that  
198 explained all procedures, risks, and benefits. This information was verbally presented during  
199 briefings, and participants indicated their consent to take part in the survey component by  
200 entering a unique study ID number to begin the online survey. A waiver of the requirement to  
201 document consent for the survey component of this study was granted. The survey component  
202 of this study was also approved to include individuals under 18 years of age under 21 CFR  
203 50.51/45 CFR 46.404. For the subset of participants 18 years or older taking part in the  
204 laboratory sub-study, written informed consent was obtained prior to participation in any  
205 laboratory study procedures.

## 206 **Context and setting**

207           This study aims to investigate mental health and adaptive functioning among young  
208 military recruits before and after BCT, and beyond, offering a unique opportunity to study  
209 resilience in response to a well-defined, naturally occurring, uniform military stressor. BCT is a  
210 mandatory, intensive, 10-week training course that all military recruits must successfully  
211 complete. The training environment is highly structured, characterized by low personal  
212 autonomy, with strict discipline enforced by drill instructors.<sup>29</sup> One distinctive aspect of BCT is  
213 the deliberate introduction of numerous stressors into the training environment, designed to  
214 prepare recruits for the challenges they will face in future military life.<sup>30</sup> These challenges  
215 include prolonged separation/isolation from family/friends, dramatic changes in living  
216 environment, extreme physical demands, mental challenges, and simulated combat. This  
217 process is believed to foster unit cohesion and cultivate a strong sense of mental and physical  
218 toughness known as the “warrior ethos.” Previous research has shown that BCT has positive  
219 effects on cognitive performance, mood, and physical fitness,<sup>31–35</sup> and it is associated with  
220 increased unit cohesion over time, which in turn, leads to reduced psychological distress and  
221 improvements in tolerating training stressors.<sup>36</sup>

222           While the majority of military recruits successfully adapt to the challenges of BCT, some  
223 individuals experience it as highly stressful and a considerable percentage (approximately 20%)  
224 of National Guard recruits fail to complete BCT.<sup>37</sup> This suggests that although BCT is a uniform  
225 stressor experienced by all recruits, its impact and perceived stressfulness vary among  
226 individuals. A study of Swiss Armed Forces recruits participating in a 21-week BCT course found  
227 that higher perceived stress at the beginning of training was associated with greater mental

228 distress and poorer military performance at later stages. Previous studies focusing solely on BCT  
229 completers have overlooked valuable data from a significant minority of individuals who exhibit  
230 reduced resilience.

231           To comprehensively understand how BCT influences adaptive functioning and study  
232 resilience processes over time, we employ a prospective, longitudinal research design with data  
233 collection before and after the relatively uniform stressor of BCT. This design makes it possible  
234 to capture change within subjects over time and allows us to test the temporal ordering of  
235 variables. Longitudinal designs permit stronger inferences about causal effects, although not  
236 the rigor of a randomized controlled trial. Our design also provides insight into the underlying  
237 mechanisms contributing to individual variations in resilience and allows for studying the  
238 impact of unforeseen events such as the COVID-19 pandemic and military deployments on  
239 resilience trajectories. By evaluating the perceived frequency and intensity of stressor exposure  
240 during BCT, we capture the individual experiences of military recruits. Furthermore, our focus  
241 on young, healthy participants at the beginning of their military careers, before significant  
242 exposure to military stressors, enables us to take a developmental approach to studying  
243 resilience within a military context. Finally, the integration of a laboratory sub-study within our  
244 research design provides an opportunity to conduct in-depth, multilevel assessments of a  
245 subset of the cohort. This laboratory sub-study allows us to investigate neurobehavioral  
246 markers of self-regulation that may predict resilience trajectories, enhancing our understanding  
247 of the underlying mechanisms associated with resilience in the context of military training.

## 248 **Participants and recruitment**

249 Enrollment of participants for this study was based on specific inclusion criteria.  
250 Individuals aged 17 years or older, who were newly enlisted members of the National Guard  
251 and had been assigned a ship date to complete BCT during the study period, were eligible for  
252 participation. Exclusion criteria included a history of prior military service or any previous  
253 experience with BCT.

254 To recruit participants, a consecutive approach was employed within designated National  
255 Guard Recruitment Sustainment Program (RSP) units across the state until the target sample  
256 was reached. The research team conducted participant recruitment between April 14, 2019 and  
257 October 16, 2021, utilizing briefing presentations held during drill events at military posts. The  
258 relevant Army National Guard command provided the research team with a list of all potentially  
259 eligible MSMs. During briefings, interested individuals were provided with a study packet,  
260 which included a consent/assent letter, “Help Us Keep in Touch” locator form, “What to Expect  
261 Next” card illustrating the study design in layman’s terms, and a randomly generated unique  
262 study identification (ID) number. Throughout the recruitment process, detailed documentation  
263 was maintained. This included recording the total number of eligible MSMs approached, as well  
264 as the number of participants enrolled, those who refused to participate, and those found to be  
265 ineligible based on the inclusion and exclusion criteria.

## 266 **Survey data collection procedures**

267 For the online survey component conducted at baseline (Time 0), participants were  
268 asked to complete a battery of self-report questionnaires on Qualtrics as well as select tests

269 from the Penn Computerized Neurocognitive Battery (PCNB). Time 0 data was collected using  
270 study Chromebooks in classrooms at local armories. Participants were instructed to log into a  
271 secure online Qualtrics platform using their unique study ID for authentication. On average, the  
272 baseline data collection process took approximately 135 minutes ( $SD = 41$ ).

273 Since exposure to BCT is required for continued follow-up, participants are monitored  
274 over the course of the study and retrospectively excluded if discharged prior to exposure to  
275 BCT. Participants' exposure to BCT is verified prior to the initial follow-up wave (T1), and those  
276 eligible to continue study participation are invited to complete the battery of self-report  
277 questionnaires at each follow-up time point (see **Table 1**). All follow-up assessments are  
278 completed outside of drill training. Participants either complete a battery of computerized self-  
279 administered questionnaires using a confidential online survey which is linked to the  
280 participants' study ID or via a paper-and-pencil version of questionnaires marked with study ID.

281 To ensure continuity of follow-up assessments, we adapted a longitudinal retention  
282 model developed by Scott and colleagues<sup>38</sup> to engage and maintain contact with participants  
283 from enrollment through the final follow-up time point. During enrollment, participants were  
284 asked to provide detailed contact information, BCT ship and return dates, as well as full contact  
285 information for three alternate contacts who can help the study team locate the participant if  
286 needed. Study engagement will be maintained between follow-up waves through periodic  
287 communication (i.e., newsletters, greeting cards), and survey non-respondents will be  
288 contacted to encourage survey completion. Due to military regulations, participants did not  
289 receive financial compensation at baseline. However, potential participants were informed they  
290 would receive up to \$150 for completing follow-up surveys.

**Table 1.** Self-report measures administered over time in the ARMOR longitudinal study

| Outcome/Domain                  | Measure                                                                | k   | T0 | T1 | T2 | T3 | T4 |
|---------------------------------|------------------------------------------------------------------------|-----|----|----|----|----|----|
| Internalizing symptoms          | PROMIS-Depression 4 <sup>39</sup>                                      | 4   | X  | X  | X  | X  | X  |
|                                 | PROMIS-Anxiety 4 <sup>39</sup>                                         | 4   | X  | X  | X  | X  | X  |
|                                 | PROMIS-Anger 5 <sup>39</sup>                                           | 5   | X  | X  | X  | X  | X  |
|                                 | Primary Care PTSD Screen DSM-5 <sup>40</sup>                           | 6   | X  | X  | X  | X  | X  |
| Externalizing problems          | Behavioral Report on Rule-Breaking <sup>41</sup>                       | 18  | X  | X  | X  | X  | X  |
|                                 | Alcohol Use Disorders Test <sup>42</sup>                               | 10  | X  | X  | X  | X  | X  |
|                                 | Drug Abuse Screening Test <sup>43</sup>                                | 10  | X  | X  | X  | X  | X  |
| Social-occupational functioning | PROMIS - Role Satisfaction <sup>44</sup>                               | 4   | X  | X  | X  | X  | X  |
|                                 | PROMIS - Social Participation <sup>44</sup>                            | 4   | X  | X  | X  | X  | X  |
|                                 | Couple Satisfaction Inventory <sup>45</sup>                            | 4   | X  | X  | X  | X  | X  |
|                                 | Revised Conflict Tactic Scales Items <sup>46</sup>                     | 2   | X  | X  | X  | X  | X  |
|                                 | Endicott Work Productivity Scale <sup>47</sup>                         | 12  | X  | X  | X  | X  | X  |
|                                 | Utrecht Work Engagement Scale <sup>48</sup>                            | 9   | X  | X  | X  | X  | X  |
| Health                          | Patient Health Questionnaire-15 <sup>49</sup>                          | 15  | X  | X  | X  | X  | X  |
|                                 | Graded Chronic Pain Scale-Revised <sup>50</sup>                        | 6   |    | X  | X  | X  | X  |
| Self-regulatory processes       | Difficulties in Emotional Regulation Scale-16 <sup>51</sup>            | 16  | X  | X  | X  | X  | X  |
|                                 | Multidimensional Experiential Avoidance Questionnaire-30 <sup>52</sup> | 30  | X  | X  | X  | X  | X  |
|                                 | Attention Control Scale <sup>53</sup>                                  | 20  | X  | X  | X  | X  | X  |
|                                 | Flexible Regulatory Emotional Expression <sup>54</sup>                 | 16  | X  | X  | X  | X  | X  |
|                                 | Identity Coherence Scale <sup>55</sup>                                 | 12  | X  | X  | X  | X  | X  |
|                                 | Response to Stressful Experiences Scale <sup>56</sup>                  | 22  | X  | X  | X  | X  | X  |
| Supportive relationships        | PROMIS-Emotional Support 4 <sup>57,58</sup>                            | 4   | X  | X  | X  | X  | X  |
|                                 | PROMIS-Informational Support 4                                         | 4   | X  | X  | X  | X  | X  |
|                                 | PROMIS-Instrumental Support 4                                          | 4   | X  | X  | X  | X  | X  |
|                                 | Deployment Risk and Resilience Inventory-2 Unit Support <sup>59</sup>  | 12  | X  | X  | X  | X  | X  |
| Personality                     | Multidimensional Personality Questionnaire-Brief Form <sup>60</sup>    | 155 | X  |    |    |    |    |
|                                 | Triarchic Psychopathy Measure <sup>61</sup>                            | 58  | X  |    |    |    |    |
| Vulnerability/risk factors      | Adverse Childhood Experiences Questionnaire <sup>62†</sup>             | 17  | X  |    |    | X  |    |
|                                 | DRRI-2 Prior Stressors <sup>66</sup>                                   | 18  | X  |    |    |    |    |
|                                 | DRRI-2 Adapted Post-deployment Life Stressor <sup>59</sup>             |     |    | X  | X  | X  | X  |
|                                 | Past suicide behaviors <sup>63</sup>                                   | 6   | X  |    |    |    |    |
|                                 | Basic Training Stressors Scale <sup>24</sup>                           | 14  |    | X  |    |    |    |

291 Note: k = number of items, T0 = Baseline/Time 0 collected before Basic Combat Training (BCT); T1 = Time 1  
 292 collected 2 weeks following BCT; T2 = Time 2 collected 6 months post-BCT; T3 = Time 3 collected 12 months post-  
 293 BCT; T4 = Time 4 collected 18 months post-BCT; DRRI-2 = Deployment Risk and Resilience Inventory-2 †Adverse  
 294 Childhood Experiences Questionnaire adapted for youth at T0.

## 295 **Measures**

296 **Table 1** lists the battery of self-report questionnaires administered online via Qualtrics  
297 at baseline and at each follow-up. This battery of measures assesses eight domains  
298 (internalizing symptoms, externalizing problems, social-occupational functioning, health, self-  
299 regulation processes, supportive relationships, personality, and vulnerability/risk factors). While  
300 most questionnaires are repeated across all timepoints (T0-T4) as they are critical for tracking  
301 outcome trajectories and resilience processes, some are assessed only at T0 (i.e., personality)  
302 or T1 (i.e., BCT stressor exposure) as they do not require repeated assessment. **Table 2** provides  
303 a complete description of neurocognitive tests administered at baseline from the PCNB, which  
304 measures performance accuracy (e.g., proportion of correct responses) and speed (e.g., median  
305 correct response time) in major cognitive domains.<sup>64</sup> All participants enrolled in the longitudinal  
306 study were also asked for a DNA saliva sample at baseline that is stored for future analysis.

## 307 **Outcomes**

308 Primary outcomes include trajectories of internalizing symptoms, externalizing problems,  
309 social-occupational functioning, and global adaptive functioning. Secondary outcomes are self-  
310 reported self-regulatory processes, neurobehavioral markers of self-regulation, and ecologically  
311 valid markers of functioning extracted from administrative military records.

## 312 **Administrative data**

313 The study team will work with the local National Guard to extract administrative data  
314 capturing sociodemographic and service-related variables (i.e., Armed Forces Qualification Test  
315 score, training dates, and military discharge). Administrative data from military records will be

**Table 2.** Tests from the Penn Computerized Neurocognitive Battery included in the ARMOR longitudinal study (Time 0 only)

| Neurobehavioral Function | Domain                  | Test                              |
|--------------------------|-------------------------|-----------------------------------|
| Executive control        | Attention               | Penn Continuous Performance Test  |
| Complex cognition        | Language reasoning      | Penn Verbal Reasoning Test        |
| Episodic memory          | Face memory             | Penn Facial Memory Test           |
| Social cognition         | Emotion differentiation | Penn Emotion Differentiation Test |

316 de-identified and matched by participant ID.

## 317 **Laboratory sub-study data collection procedures**

318 A subsample of the longitudinal cohort (n=123) was identified to participate in a  
319 laboratory visit both pre and post-BCT. Laboratory participants are selected based on their  
320 responses to baseline self-report measures and a predictive algorithm developed in the pilot  
321 UG3 phase of this project (details reported elsewhere).<sup>65</sup> This strategy is intended to provide a  
322 subsample enriched with subjects at relatively high-risk of maladaptive functioning (n~72)  
323 compared to a low-risk group (n~48). Participants are briefly screened by phone, and those  
324 reporting contraindications to MRI due to the potential presence of metal in the body (e.g.,  
325 employed as a metal worker, implanted medical devices) or due to problems with being in  
326 enclosed places are excluded.

327 Data for the laboratory sub-study is collected during an 8-9 hour combined total visit to  
328 the MVHCS and UMN Center for Magnetic Resonance Research (CMRR). First, participants  
329 undergo a structured clinical interview (1-2 hours) with a trained master's level assessor under  
330 the supervision of a licensed clinical psychologist (CRE or PAA). The Structured Clinical Interview  
331 for DSM-5 is used to diagnose lifetime and current mental disorders.<sup>66</sup> The Clinician  
332 Administered PTSD Scale for DSM-5 is used to diagnose PTSD.<sup>67</sup> Next, while undergoing  
333 preparation for the EEG session, participants are asked to complete a battery of paper-and-



334 pencil questionnaires specifically targeting constructs related to self-regulation (see **Table 3**).

### 335 **Electroencephalography (EEG)**

336 Participants will complete an EEG session to measure resting state neural function as  
337 well as brain responses during cognitive tasks. We will use electrodes embedded in an elastic  
338 cap to record from 128 scalp sites. The precise physical location of electrodes will be recorded  
339 in three-dimensional space with respect to auricular and nasion landmarks so EEG recordings  
340 can be integrated with the corresponding structural MRI data. To measure eye movements for  
341 the detection of bioelectrical artifacts vertical electro-oculograms (VEOG) will be recorded from  
342 above and below the right eye and horizontal electro-oculograms (HEOG) will be recorded from  
343 outer ocular canthi. Left and right forearm electromyographs (EMGs), and electrocardiograms  
344 (EKG) will be recorded to identify and reduce artifact and quantify aspects of muscle  
345 contraction associated with button presses. EEG signals will be digitized at a rate of 512 Hz with  
346 0.5 Hz low frequency cut-off and 200 Hz high frequency cut-off filters. Each participant will  
347 complete assessments of visual acuity and handedness as well as information about  
348 medications, alcohol, caffeine, and sleep in the last 24 hours. Self-report ratings of emotional  
349 state will be assessed before and after EEG recording sessions using the Positive Affect Negative  
350 Affect Scale (PANAS).<sup>68</sup>

351 During EEG collection at the pre and post-BCT visits, participants perform a series of  
352 neurobehavioral tasks assessing attentional control (dot probe paradigm),<sup>75,76</sup> emotional  
353 inhibitory control (go/no-go paradigm),<sup>77,78</sup> and feedback processing (gambling decision  
354 paradigm).<sup>79</sup> **Table 4** provides a description of neurobehavioral tasks administered and domains  
355 assessed.

| Measure                                                       | <i>k</i> | Pre--BCT Lab | Post-BCT Lab |
|---------------------------------------------------------------|----------|--------------|--------------|
| Patient Health Questionnaire-9 <sup>73</sup>                  | 9        | X            | X            |
| Beck Depression Inventory-II <sup>70</sup>                    | 21       | X            | X            |
| Depressive Symptom Index — Suicidality Subscale <sup>71</sup> | 4        | X            | X            |
| State Trait Anxiety Inventory <sup>72</sup>                   | 40       | X            | X            |
| Positive and Negative Affect Schedule <sup>68</sup>           | 20       |              |              |
| Anxiety Sensitivity Index <sup>73</sup>                       | 16       | X            | X            |
| Intolerance of Uncertainty Scale-Short Form <sup>74</sup>     | 12       | X            | X            |

*Note.* *k* = Number of items comprising measure, BCT = Basic Combat Training

356 **Magnetic Resonance Imaging (MRI)**

357 At the pre-BCT laboratory visit only, MRI data are collected at the University of  
358 Minnesota’s Center for Magnetic Resonance Research (CMRR) on a 3T Siemens Prisma scanner,  
359 using a 32-channel birdcage head coil with foam pads to minimize head movements. Sequences  
360 included T1-weighted MP-RAGE, T2-weighted SPACE, diffusion-weighted, resting state  
361 functional, and task-based functional MRI. While in the MRI environment, participants  
362 complete the Farmer task (see **Table 4**), a gamified task designed to assess adaptive versus  
363 maladaptive, avoidance responding in the face of physical threat. The task measures fear  
364 reactivity and behavioral avoidance to safe cues that resemble cues of imminent electric  
365 shocks.<sup>80</sup> Decisions to ‘unnecessarily’ avoid during safe cues is considered *maladaptive* because  
366 danger (threat of shock) is not a realistic possibility, and avoiding unnecessarily compromises  
367 performance on the task. Adaptive responding is operationalized by higher rates of decisions to  
368 push through (i.e., low levels of avoidance) when encountering safe, yet danger-resembling,  
369 cues.

370 Finally, participants are asked to provide a blood sample to be stored for future research  
371 (30 min). Participants were compensated up to \$400 for completion of both the pre-BCT and  
372 post-BCT visits.

| <b>Neurobehavioral task</b>           | <b>Task description</b>                                                                                                                                                                                                                                                                                                                                                                                                                                                                                                                                                                                                                                                                                                                                                                                                                                                                                                                        | <b>Domain assessed</b>                    | <b>Pre-BCT</b> | <b>Post-BCT</b> |
|---------------------------------------|------------------------------------------------------------------------------------------------------------------------------------------------------------------------------------------------------------------------------------------------------------------------------------------------------------------------------------------------------------------------------------------------------------------------------------------------------------------------------------------------------------------------------------------------------------------------------------------------------------------------------------------------------------------------------------------------------------------------------------------------------------------------------------------------------------------------------------------------------------------------------------------------------------------------------------------------|-------------------------------------------|----------------|-----------------|
| Dot Probe Task <sup>75</sup>          | Participants passively inspect rapidly presented face pairs with neutral, happy, or angry/threatening expressions. Faces are replaced with either a blank space or an asterisk (target probe) placed in the same position as one of the two faces. Participants are instructed to respond as quickly as possible to indicate on which side the target probe appeared.                                                                                                                                                                                                                                                                                                                                                                                                                                                                                                                                                                          | Attentional bias                          | X              | X               |
| Emotional Go/No-Go Task <sup>77</sup> | Participants view a series of rapidly presented visual targets and nontargets. Participants are instructed to press a response button for each target presented ("Go trials") and to avoid pressing the button for each nontarget ("NoGo trials"). Errors (response to NoGo trials or failure to respond to Go trials) are accompanied by visual (red bar in center of screen) and auditory (unpleasant buzzer sound) feedback. The task is completed in three blocks with adaptive response timing windows to increase task difficulty based on performance. Participants are also instructed they can win a monetary reward based on the number of points earned, which is displayed on screen every 20 trials. During the second block, time windows are shortened to increase the task's difficulty beyond what is feasible for participants. Points awarded during the second block for correct responses are also significantly reduced. | Inhibitory control                        | X              | X               |
| Gambling task <sup>79</sup>           | For each trial, participants are presented with two adjacent squares each enclosing a number (5 or 25). Participants are instructed to choose between the two squares and then receive feedback (the chosen box turns red or green to signify either a win or a loss with red or green as the winning color counterbalanced across participants).                                                                                                                                                                                                                                                                                                                                                                                                                                                                                                                                                                                              | Error/performance monitoring, risk-taking | X              | X               |

|                           |                                                                                                                                                                                                                                                                                                                                                                                                                                                                                                                                                                                                                                                                                                                                                                                                                                                                                    |                                  |   |  |
|---------------------------|------------------------------------------------------------------------------------------------------------------------------------------------------------------------------------------------------------------------------------------------------------------------------------------------------------------------------------------------------------------------------------------------------------------------------------------------------------------------------------------------------------------------------------------------------------------------------------------------------------------------------------------------------------------------------------------------------------------------------------------------------------------------------------------------------------------------------------------------------------------------------------|----------------------------------|---|--|
| Farmer task <sup>80</sup> | The participant is a farmer whose task it is to travel between a shed and garden to harvest crops. Two different roads connect a shed to a garden: 1) a short road, and 2) a long road. Traveling the short road is perilous (contingently associated with electric shock [3-5mA, 100ms]) but allows the farmer quick travel from shed to garden and assures a successful harvest. Conversely, traveling the long road is always safe but often prevents the farmer from arriving at the garden before “wild birds” eat the crop. Through fear-conditioning, participants learn shock is predicted by a symbol, a ring of extreme size (CS+) but not the other size rings (conditioned safety-cue: CS-) displayed on the screen. The task measures fear generalization by assessing avoidance behavior in response to generalization stimuli similar but not identical to the CS+. | Maladaptive behavioral avoidance | X |  |
|---------------------------|------------------------------------------------------------------------------------------------------------------------------------------------------------------------------------------------------------------------------------------------------------------------------------------------------------------------------------------------------------------------------------------------------------------------------------------------------------------------------------------------------------------------------------------------------------------------------------------------------------------------------------------------------------------------------------------------------------------------------------------------------------------------------------------------------------------------------------------------------------------------------------|----------------------------------|---|--|

373 **Data management**

374 Data collected via the online survey platform (Qualtrics) administered at the UMN and  
 375 will be downloaded securely into the study databases stored on a shared server at the MVAHCS  
 376 with access limited to authorized study personnel. Qualtrics includes a complete suite of  
 377 features to support HIPAA compliance, including a full audit trail, user-based privileges, and  
 378 integration with the institutional LDAP server. Hard copy surveys will be double entered and  
 379 checked for consistency. Laboratory sub-study data (i.e., neuroimaging and EEG data) will be  
 380 stored in secure databases held on servers at UMN and are only available to lead investigators  
 381 of each sub-study component. Administrative data will be transferred directly from MNARNG to  
 382 a secure server at MVAHCS via secure data transfer. At MVAHCS, the data will be accessible by  
 383 a named CCDOR Data/Statistics Team member. This individual will de-identify the personal  
 384 information, match records with study ID number, and transfer it to shared server for the study.

385 Study ID numbers will be used for data transfer, communication, and analysis purposes to  
386 protect confidentiality. Participant contact information linked with study ID number will be  
387 stored on a SQL server database will be created on internal VA web servers. Only individuals  
388 with a need to access the data, as vetted by the principal investigator are granted access.  
389 Access to contact information is obtained through Windows authentication (i.e., PIV card and  
390 password to the network).

### 391 **Sample size and power analysis**

392 Sample size calculations were based on the primary objective of the study (Aims 1-2)  
393 using structural equation models of various hypothesized structures (nested and longitudinal).  
394 This demand resulted in a sample size that could provide enough power to test such  
395 hypotheses across varying degrees of freedom. Control of Root Mean Square Error of  
396 Approximation (RMSEA) was the criteria used for our sample size and power calculations.  
397 According to MacCallum and colleagues,<sup>81</sup> RMSEA= 0.01, 0.05, and 0.08 indicate excellent,  
398 good, and mediocre fit. **Table 5** gives the needed sample sizes and the corresponding powers  
399 for various degrees of freedom, assuming a null RMSEA of 0.05 and an alpha=0.05. Assuming a  
400 retention rate of 65% to reach an effective sample size of 780, we needed to recruit 1200  
401 participants. Note that for n=780, models with df=5 and greater, would have an expected  
402 power of at least 0.909.

### 403 **Statistical analyses planned**

404 Aim 1 will characterize adaptation among young military recruits over the first two years  
405 of service. Consistent with a hierarchical concept of the structure of resilience, we will use  
406 latent growth mixture modeling (LGMM) to identify the latent trajectories of adaptation and its

**Table 5.** Sample size and power calculations

| Sample size | df=2  | df=5  |
|-------------|-------|-------|
| 700         | 0.567 | 0.878 |
| 800         | 0.619 | 0.916 |
| 1000        | 0.707 | 0.961 |
| 1200        | 0.776 | 0.982 |

407 indicators. We will apply LGMM at the level of internalizing symptoms, externalizing problems,  
408 and social-occupational functioning, as well as an overall model that simultaneously embeds all  
409 three domains into a model of adaptive functioning. We have hypothesized that at least three  
410 trajectories (one showing resilient adaptive functioning or low pathology, and others showing  
411 new onset and chronic distress) will emerge for each domain assessed (internalizing symptoms,  
412 externalizing problems, social-occupational functioning, and global adaptive functioning).

413 Note: All remaining analyses for Aims 2 and 3 will be conducted on the trajectory class  
414 membership data for each of these four domain outcomes to test for specificity of resilience  
415 mechanisms.

416 Aim 2 will identify promotive factors and protective processes contributing to individual  
417 variations in adaptation. We will apply structural equation modeling and Bayesian Network  
418 Analysis to detect and identify the latent constructs and the dependency structure between  
419 different domains. We will also examine the effect of protective and vulnerability factors on  
420 membership in different trajectory classes. We propose to investigate this in two  
421 complementary ways. First, in our SEM modeling we will augment the measurement submodels  
422 of the most parsimonious latent growth structural mixture models accepted in Aim 1 with the  
423 indicators of protective/vulnerability measurements (**Tables 1 and 2**) and evaluate the change  
424 in the relationships (coefficients) indicators have with the latent trajectories. We will treat  
425 potential predictors as moderators or mediators, depending on the hypothesized role in the

426 model, and we will test their contribution to the model by change in model fit indices (AIC, BIC,  
427 RMSE,  $G^2$ ). In our second approach, trajectory class membership assignment in Aim 1 will be  
428 used as dependent variables (resilience vs non-resilient/distressed trajectories) and  
429 protective/vulnerability factors as predictors in random intercept multinomial logistic mixed  
430 models that will provide a quantitative picture of the unique contribution of these measures.  
431 We hypothesize risk factors listed in **Tables 1 and 2** will predict membership in non-  
432 resilient/distressed trajectory classes, while protective/promotive factors will predict  
433 membership in the resilient/non-distressed trajectory class. All analyses will be estimated  
434 within the propensity classes that adjust for any possible lack of imbalance and will be  
435 performed both on the complete cases and five imputed data sets.

436        Aim 3 investigates whether neurobehavioral markers of self-regulation assessed using a  
437 series of performance-based tasks involving EEG and fMRI assessments are predictive of  
438 resilient/non-resilient trajectories. EEG recordings will undergo an independent component  
439 analysis-based processing pipeline to isolate and remove noisy time segments, signal artifacts  
440 (e.g., eye movements), and bad electrodes. Recording epochs centered around the onset of  
441 task stimuli will be extracted for the analysis of event-related potentials (ERPs) and time-  
442 frequency energy. Given the study focus on conflict monitoring and bottom-up covert  
443 attention, we plan to examine brain responses at midline frontal (e.g., FCz) and lateralized  
444 posterior electrodes (e.g., PO7, PO8), respectively. We will quantify brain response metrics such  
445 as feedback-related negativity and theta-band oscillations, which we predict will be associated  
446 with trajectory class membership. fMRI during the Farmer Task will be analyzed using an event-  
447 related design to model BOLD fluctuations to stimuli onsets using Analysis of Functional Neural

448 Images (AFNI) software.<sup>82</sup> Functional activation maps will be computed by regressing each  
449 voxel's fMRI response time-course onto an ideal response function for 5 stimulus types: the  
450 danger cue, three classes of safety cues with parametrically varying levels of perceptual  
451 similarity to the danger cue, and a control condition including a safety cue with no similarity to  
452 the danger cue.<sup>83</sup> We will focus particularly on fMRI responses to these stimuli in brain areas  
453 associated with fear reactivity (anterior insula, dorsomedial prefrontal cortex) and fear  
454 inhibition (ventromedial prefrontal cortex, anterior hippocampus). Fear-related brain  
455 activations to safe cues resembling danger cues (relative to safe cues without danger-cue  
456 resemblance) will be used as predictors of maladaptive avoidance (costly/unnecessary  
457 avoidance to safe cues resembling danger cues). Finally, these brain and behavioral responses,  
458 as well as their moderation by protective (e.g., social support, military cohesion, self-regulation)  
459 and vulnerability factors (e.g., BCT stressors, anxiety traits) will be used as predictors of  
460 trajectory class membership.

## 461 **Missing data**

462 Every effort will be made to maximize complete data and responding across waves in  
463 the longitudinal survey (Aims 1 and 2). However, the collected data at each wave will be subject  
464 to various random missingness. At the end of each wave, the mechanism of missingness for  
465 each measured variable will be assessed and an imputation model proper to that variable  
466 (predictor/response/ adjustor covariate) will be identified. Appropriate imputation methods  
467 based on variable characteristics (e.g., regression for continuous variables, propensity or  
468 discrimination models or categorical models) will be used. After selecting a relevant model, and  
469 more importantly, deciding on the predictors of missingness, five imputed data sets will be



470 constructed for each wave. The relevant analyses will then be based on the combined  
471 inferences derived from these five imputed data sets.

## 472 **Results**

473 Study enrollment began April 14, 2019 and ended in October 16, 2021. A total of 1,201  
474 participants are enrolled in the study (68.9% male; mean age = 18.9, SD = 3.0). Follow-up data-  
475 collection is ongoing and is projected to continue through March 2024.

## 476 **Discussion**

477 To our knowledge, ARMOR is the first study to characterize trajectories of adjustment  
478 (i.e., resilient versus non-resilient) among US Army National Guard recruits using  
479 multidimensional assessments undertaken beginning at career onset and spanning two  
480 subsequent years. By assessing recruits before BCT and following up across 4 timepoints, the  
481 design provides an opportunity to map individual trajectories in response to exposure to a  
482 naturally occurring, uniform military challenge. The study aims to characterize adaptation  
483 among young military recruits over the first two years of service and identify processes  
484 contributing to individual variations in adaptation. While studies have identified numerous  
485 resilience factors, this study takes a longitudinal, multi-level approach to examine mechanisms  
486 underlying individual variations in resilience trajectories. In addition, this study utilizes an  
487 embedded laboratory sub-study design that integrates novel laboratory-based experimental  
488 paradigms for assessing dynamic self-regulatory processes into a large, prospective,  
489 longitudinal study. This approach will enable us to explore whether neurobehavioral markers of  
490 self-regulation assessed using a series of performance-based tasks involving EEG and fMRI

491 assessments are predictive of resilient/non-resilient trajectories. By understanding the  
492 mechanisms underlying self-regulatory processes implicated in resilience, findings from our  
493 study will provide a foundation for the development of prevention and intervention strategies  
494 which may help to promote positive adaptation and resilience among young military recruits.  
495 Specifically, findings of this study may support the optimization of mindfulness-based  
496 interventions, which focus on increasing awareness of one's thoughts, emotions, and actions to  
497 improve specific aspects of executive functioning including attention, cognitive control, and  
498 emotion regulation.

## 499 **Patient and public involvement**

500 Military stakeholders from the local National Guard command were involved in the  
501 research process beginning at the early planning stage by identifying relevant research  
502 questions and providing consultation on feasibility of study methods. Outcome measures were  
503 informed by their priorities and military experience. Local National Guard command also  
504 facilitated the study team's access to military personnel and allocated training time for the  
505 investigators to present information about the study to potential participants and collect  
506 baseline data.

507 Findings of the study will be shared with stakeholders through regular briefings to  
508 military command. Findings will be communicated to the public through various types of media,  
509 including print (e.g., newsletters, white papers) and broadcast channels (e.g., television and  
510 radio). Findings will be disseminated to the scientific community through peer reviewed  
511 publications and presentations.

## 512 **Acknowledgements**

513           The authors wish to acknowledge Dr. Christopher Erbes, who passed away on May 30,  
514 2021. Dr. Erbes served as Multiple PI on this project and contributed to the overall design and  
515 conceptualization of the study.

516           The content is solely the responsibility of the authors and does not necessarily represent  
517 the official views of the Departments of Veterans Affairs, Army, or Defense or the National  
518 Institutes of Health (NIH).

519           We received funding from UH3AT009651 from the National Center for Complementary  
520 and Integrative Health (NCCIH) of the NIH. This work also was supported by resources and the  
521 use of facilities at the Minneapolis VA Health Care System, Minneapolis, MN. We would like to  
522 express our gratitude to the National Guard service members volunteering to participate in the  
523 study.

## 525 **References**

- 526 1. Smith BN, Vaughn RA, Vogt D, King DW, King LA, Shipherd JC. Main and interactive effects  
527 of social support in predicting mental health symptoms in men and women following  
528 military stressor exposure. *Anxiety Stress Coping*. 2011;(1477-2205 (Electronic)).
- 529 2. Campbell DJ, Nobel OBY. Occupational stressors in military service: A review and  
530 framework. *Mil Psychol*. 2009;21(sup2):S47-S67.
- 531 3. Adler AB, Castro CA. An occupational mental health model for the military. *Mil Behav*  
532 *Health*. 2013;1(1):41-45.
- 533 4. Galatzer-Levy IR, Huang SH, Bonanno GA. Trajectories of resilience and dysfunction  
534 following potential trauma: A review and statistical evaluation. *Clin Psychol Rev*.  
535 2018;63:41-55.
- 536 5. Polusny MA, Erbes CR, Kramer MD, et al. Resilience and posttraumatic stress disorder  
537 symptoms in National Guard Soldiers deployed to Iraq: A prospective study of latent class  
538 trajectories and their predictors. *J Trauma Stress*. 2017;30(4):351-361.
- 539 6. Xue C, Ge Y, Tang B, et al. A meta-analysis of risk factors for combat-related PTSD among  
540 military personnel and veterans. *PLoS One*. 2015;10(1932-6203 (Electronic)):e0120270.  
541 doi:10.1371/journal.pone.0120270
- 542 7. Ramchand R, Rudavsky R, Grant S, Tanielian T, Jaycox L. Prevalence of, risk factors for, and  
543 consequences of posttraumatic stress disorder and other mental health problems in  
544 military populations deployed to Iraq and Afghanistan. *Curr Psychiatry Rep*. 2015;17(1535-  
545 1645 (Electronic)):37. doi:10.1007/s11920-015-0575-z
- 546 8. Stander VA, Thomsen CJ, Highfill-McRoy RM. Etiology of depression comorbidity in combat-  
547 related PTSD: a review of the literature. *Clin Psychol Rev*. 2014;34(2):87-98.
- 548 9. Lin T, Vaisvaser S, Fruchter E, et al. A neurobehavioral account for individual differences in  
549 resilience to chronic military stress. *Psychol Med*. 2015;45(1469-8978 (Electronic)):1011-  
550 1023.
- 551 10. van der Meulen E, van der Velden PG, van Aert RC, van Veldhoven MJ. Longitudinal  
552 associations of psychological resilience with mental health and functioning among military  
553 personnel: A meta-analysis of prospective studies. *Soc Sci Med*. 2020;255:112814.
- 554 11. Choi KW, Stein MB, Dunn EC, Koenen KC, Smoller JW. Genomics and psychological  
555 resilience: a research agenda. *Mol Psychiatry*. 2019;24(12):1770-1778. doi:10.1038/s41380-  
556 019-0457-6

- 557 12. Masten AS, Lucke CM, Nelson KM, Stallworthy IC. Resilience in Development and  
558 Psychopathology: Multisystem Perspectives. *Annu Rev Clin Psychol.* 2021;17(1):521-549.  
559 doi:10.1146/annurev-clinpsy-081219-120307
- 560 13. Brown L, Cohen B, Costello R, Brazhnik O, Galis Z. Conceptualizing a resilience research  
561 framework at The National Institutes of Health. *Stress Health.* Published online 2023.
- 562 14. Ungar M. *Multisystemic Resilience: Adaptation and Transformation in Contexts of Change.*  
563 Oxford University Press; 2021.
- 564 15. Han SC, Castro F, Lee LO, et al. Military unit support, postdeployment social support, and  
565 PTSD symptoms among active duty and National Guard soldiers deployed to Iraq. *J Anxiety*  
566 *Disord.* 2014;28(1873-7897 (Electronic)):446-453. doi:10.1016/j.janxdis.2014.04.004
- 567 16. Pietrzak RH, Johnson DC, Goldstein MB, et al. Psychosocial buffers of traumatic stress,  
568 depressive symptoms, and psychosocial difficulties in veterans of Operations Enduring  
569 Freedom and Iraqi Freedom: The role of resilience, unit support, and postdeployment social  
570 support. *J Affect Disord.* Published online 2009.
- 571 17. Galatzer-Levy IR, Huang SH, Bonanno GA. Trajectories of resilience and dysfunction  
572 following potential trauma: A review and statistical evaluation. *Clin Psychol Rev.*  
573 2018;63:41-55. doi:10.1016/j.cpr.2018.05.008
- 574 18. Bonanno GA, Mancini AD, Horton JL, et al. Trajectories of trauma symptoms and resilience  
575 in deployed US military service members: Prospective cohort study. *Br J Psychiatry.*  
576 2012;200(4):317-323. doi:10.1192/bjp.bp.111.096552
- 577 19. Pavlacic JM, Buchanan EM, McCaslin SE, Schulenberg SE, Young JN. A systematic review of  
578 posttraumatic stress and resilience trajectories: Identifying predictors for future treatment  
579 of veterans and service members. *Prof Psychol Res Pract.* 2022;53(3):266.
- 580 20. Erbes CR, Arbisi PA, Kramer MD, DeGarmo D, Polusny MA. Characterizing spouse/partner  
581 depression and alcohol problems over the course of military deployment. *J Consult Clin*  
582 *Psychol.* 2017;85(4):297-308.
- 583 21. Luecken L, Gress-Smith JL. Early adversity and resilience in emerging adulthood. In: Zautra  
584 A, Reich JW, Hall JS, eds. *Handbook of Adult Resilience.* Guilford Publications; 2010:238-257.
- 585 22. Infurna FJ, Luthar SS. Parents' adjustment following the death of their child: Resilience is  
586 multidimensional and differs across outcomes examined. *J Res Personal.* 2017;68:38-53.
- 587 23. McGlinchey RE, Milberg WP, Fonda JR, Fortier CB. A methodology for assessing deployment  
588 trauma and its consequences in OEF/OIF/OND veterans: The TRACTS longitudinal  
589 prospective cohort study. *Int J Methods Psychiatr Res.* 2017;26(3):e1556.

- 590 24. Polusny MA, Marquardt CA, Hagel-Campbell E, et al. ADVANCING RESEARCH ON  
591 MECHANISMS OF RESILIENCE (ARMOR) LONGITUDINAL COHORT STUDY OF NEW MILITARY  
592 RECRUITS: RESULTS FROM A FEASIBILITY PILOT STUDY. *Res Hum Dev.* 2021;18(3):212-229.  
593 doi:10.1080/15427609.2021.1964898
- 594 25. Polusny MA, Erbes CR. A dynamic, multilevel approach to conceptualising and designing  
595 resilience research in the context of military stress. *Stress Health.* Published online 2023.
- 596 26. Feder A, Fred-Torres S, Southwick SM, Charney DS. The biology of human resilience:  
597 opportunities for enhancing resilience across the life span. *Biol Psychiatry.* 2019;86(6):443-  
598 453.
- 599 27. Vink M, Gladwin TE, Geeraerts S, et al. Towards an integrated account of the development  
600 of self-regulation from a neurocognitive perspective: A framework for current and future  
601 longitudinal multi-modal investigations. *Dev Cogn Neurosci.* 2020;45:100829.
- 602 28. Torrence RD, Troup LJ. Event-related potentials of attentional bias toward faces in the  
603 dot-probe task: A systematic review. *Psychophysiology.* 2018;55(6):e13051.
- 604 29. Adler AB, Williams J, McGurk D, Moss A, Bliese PD. Resilience training with soldiers during  
605 basic combat training: randomisation by platoon. *Appl Psychol Health Well Being.*  
606 2015;7(1758-0854 (Electronic)):85-107.
- 607 30. Bulmer S, Drain JR, Tait JL, et al. Quantification of Recruit Training Demands and Subjective  
608 Wellbeing during Basic Military Training. *Int J Environ Res Public Health.* 2022;19(12):7360.  
609 doi:10.3390/ijerph19127360
- 610 31. Lieberman HR, Karl JP, Niro PJ, et al. Positive Effects of Basic Training on Cognitive  
611 Performance and Mood of Adult Females. *Hum Factors J Hum Factors Ergon Soc.*  
612 2014;56(6):1113-1123. doi:10.1177/0018720813519472
- 613 32. Lieberman HR, Karl JP, McClung JP, Williams KW, Cable S. Improved Mood State and  
614 Absence of Sex Differences in Response to the Stress of Army Basic Combat Training. *Appl*  
615 *Psychol Health Well Being.* 2016;8(1758-0854 (Electronic)):351-363.  
616 doi:10.1111/aphw.12075
- 617 33. Crowley SK, Wilkinson LL, Wigfall LT, et al. Physical fitness and depressive symptoms during  
618 army basic combat training. *Med Sci Sports Exerc.* 2015;47(1):151.
- 619 34. Friedland N, Keinan G. Training effective performance in stressful situations: Three  
620 approaches and implications for combat training. *Mil Psychol.* 1992;4(3):157-174.
- 621 35. Redmond SA, Wilcox SL, Campbell S, et al. A brief introduction to the military workplace  
622 culture. *Work.* 2015;50(1):9-20. doi:10.3233/WOR-141987

- 623 36. Williams J, Brown JB, Bray RM, Anderson G, Olmsted KR, Adler AB. Unit cohesion, resilience,  
624 and mental health of soldiers in basic combat training. *Mil Psychol*. 2016;28(4):241-250.  
625 <http://psycnet.apa.org/journals/mil/28/4/241>
- 626 37. United States Government Accountability Office. *Military Recruiting: Army National Guard*  
627 *Needs to Continue Monitoring, Collect Better Data, and Assess Incentives Programs*. Vol  
628 GAO-16-36.; 2015. <http://www.gao.gov/assets/680/673689.pdf>
- 629 38. Scott CK, Sonis J, Creamer M, Dennis ML. Maximizing follow-up in longitudinal studies of  
630 traumatized populations. *J Trauma Stress*. 2006;19(0894-9867 (Print)):757-769.
- 631 39. Cella D, Choi SW, Condon DM, et al. PROMIS® adult health profiles: efficient short-form  
632 measures of seven health domains. *Value Health*. 2019;22(5):537-544.
- 633 40. Prins A, Bovin MJ, Smolenski DJ, et al. The primary care PTSD screen for DSM-5 (PC-PTSD-5):  
634 development and evaluation within a veteran primary care sample. *J Gen Intern Med*.  
635 2016;31(10):1206-1211.
- 636 41. Nelson LD, Patrick CJ, Bernat EM. Operationalizing proneness to externalizing  
637 psychopathology as a multivariate psychophysiological phenotype. *Psychophysiology*.  
638 2011;48(1):64-72.
- 639 42. Saunders JB, Aasland OG, Babor TF, de la Fuente JR, Grant M. Development of the Alcohol  
640 Use Disorders Identification Test (AUDIT): WHO Collaborative Project on Early Detection of  
641 Persons with Harmful Alcohol Consumption--II. *Addiction*. 1993;88(6):791-804.
- 642 43. Skinner HA. The drug abuse screening test. *Addict Behav*. 1982;7(4):363-371.
- 643 44. Hahn EA, Beaumont JL, Pilkonis PA, et al. The PROMIS satisfaction with social participation  
644 measures demonstrated responsiveness in diverse clinical populations. *J Clin Epidemiol*.  
645 2016;73:135-141. doi:10.1016/j.jclinepi.2015.08.034
- 646 45. Funk JL, Rogge RD. Testing the ruler with item response theory: Increasing precision of  
647 measurement for relationship satisfaction with the Couples Satisfaction Index. *J Fam*  
648 *Psychol*. 2007;21(4):572-583. [jfunk@psych.rochester.edu](mailto:jfunk@psych.rochester.edu)
- 649 46. Straus MA, Hamby SL, Boney-McCoy S, Sugarman DB. The revised Conflict Tactics Scales  
650 (CTS2): Development and preliminary psychometric data. *J Fam Issues*. 1996;17(3):283-316.
- 651 47. Endicott J, Nee J. Endicott Work Productivity Scale (EWPS): a new measure to assess  
652 treatment effects. *Psychopharmacol Bull*. 1997;33(0048-5764 (Print)):13-16.
- 653 48. Schaufeli WB, Bakker AB, Salanova M. Utrecht work engagement scale-9. *Educ Psychol*  
654 *Meas*. Published online 2003.



- 655 49. Kroenke K, Spitzer RL, Williams JB. The PHQ-15: Validity of a new measure for evaluating  
656 the severity of somatic symptoms. *Psychosom Med*. 2002;64(0033-3174 (Print)):258-266.
- 657 50. Von Korff M, DeBar LL, Krebs EE, Kerns RD, Deyo RA, Keefe FJ. Graded chronic pain scale  
658 revised: mild, bothersome, and high impact chronic pain. *Pain*. 2020;161(3):651.
- 659 51. Bjureberg J, Ljótsson B, Tull MT, et al. Development and Validation of a Brief Version of the  
660 Difficulties in Emotion Regulation Scale: The DERS-16. *J Psychopathol Behav Assess*.  
661 2016;38(2):284-296. doi:10.1007/s10862-015-9514-x
- 662 52. Sahdra BK, Ciarrochi J, Parker P, Scrucca L. Using Genetic Algorithms in a Large Nationally  
663 Representative American Sample to Abbreviate the Multidimensional Experiential  
664 Avoidance Questionnaire. *Front Psychol*. 2016;7:189. doi:10.3389/fpsyg.2016.00189
- 665 53. Derryberry D, Reed MA. Anxiety-related attentional biases and their regulation by  
666 attentional control. *J Abnorm Psychol*. 2002;111(2):225-236.
- 667 54. Burton CL, Bonanno GA. Measuring ability to enhance and suppress emotional expression:  
668 The Flexible Regulation of Emotional Expression (FREE) Scale. *Psychol Assess*.  
669 2016;28(8):929-941.
- 670 55. Rosenthal DA, Gurney RM, Moore SM. From trust on intimacy: A new inventory for  
671 examining erikson's stages of psychosocial development. *J Youth Adolesc*. 1981;10(6):525-  
672 537. doi:10.1007/BF02087944
- 673 56. Johnson DC, Polusny MA, Erbes CR, et al. Development and initial validation of the  
674 Response to Stressful Experiences Scale. *Mil Med*. 2011;176(0026-4075 (Print)):161-169.
- 675 57. Hahn EA, DeVellis RF, Bode RK, et al. Measuring social health in the patient-reported  
676 outcomes measurement information system (PROMIS): item bank development and  
677 testing. *Qual Life Res*. 2010;19(7):1035-1044.
- 678 58. Hahn EA, DeWalt DA, Bode RK, et al. New English and Spanish social health measures will  
679 facilitate evaluating health determinants. *Health Psychol*. 2014;33(1930-7810  
680 (Electronic)):490-499. doi:10.1037/hea0000055
- 681 59. Vogt D, Smith BN, King L, King D, Knight J, Vasterling J. Deployment Risk and REsilience  
682 Inventory-2 (DRRI-2): An updated tool for assessing psychosocial risk and resilience factors  
683 among service members and veterans. *J Trauma Stress*. 2013;26:710-717.
- 684 60. Patrick CJ, Curtin JJ, Tellegen A. Development and validation of a brief form of the  
685 Multidimensional Personality Questionnaire. *Psychol Assess*. 2002;14(2):150-163.
- 686 61. Blagov PS, Patrick CJ, Oost KM, Goodman JA, Pugh AT. Triarchic psychopathy measure:  
687 Validity in relation to normal-range traits, personality pathology, and psychological  
688 adjustment. *J Personal Disord*. 2016;30(1):71-81.



- 689 62. Felitti VJ, Anda RF, Nordenberg D, et al. Relationship of childhood abuse and household  
690 dysfunction to many of the leading causes of death in adults: The adverse childhood  
691 experiences (ACE) study. *Am J Prev Med.* 1998;14(4):245-258.
- 692 63. Ramsay R, Bagley C. The Prevalence of Suicidal Behaviors, Attitudes and Associated Social  
693 Experiences in an Urban Population. *Suicide Life Threat Behav.* 1985;15(3):151-167.  
694 doi:10.1111/j.1943-278X.1985.tb00941.x
- 695 64. Moore TM, Reise SP, Gur RE, Hakonarson H, Gur RC. Psychometric properties of the Penn  
696 Computerized Neurocognitive Battery. *Neuropsychology.* 2015;29(1931-1559  
697 (Electronic)):235-246.
- 698 65. Noorbaloochi S, Hagel-Campbell E, Polusny MA. A Model Enterprise : A super-learner  
699 algorithm for combining alternative supervised and unsupervised classification methods.  
700 *Manuscr Prep.* Published online 2023.
- 701 66. First MB, Williams JBW, Karg RS, Spitzer RL. Structured Clinical Interview for DSM-5-Reseach  
702 Version (SCID-5 for DSM-5, Research Version; SCID-5-RV). Published online 2015.
- 703 67. Weathers FW, Bovin MJ, Lee DJ, et al. The Clinician-Administered PTSD Scale for DSM-5  
704 (CAPS-5): Development and initial psychometric evaluation in military veterans. *Psychol*  
705 *Assess.* 2018;30(3):383.
- 706 68. Watson D, Clark LA. The PANAS-X: Manual for the positive and negative affect schedule-  
707 expanded form. Published online 1994.
- 708 69. Kroenke K, Spitzer RL, Williams JB. The PHQ-9: validity of a brief depression severity  
709 measure. *J Gen Intern Med.* 2001;16(9):606-613.
- 710 70. Beck AT, Steer RAB GK. *Manual for the Beck Depression Inventory.* Vol 2nd. The  
711 Psychological Corporation; 1996.
- 712 71. Stanley IH, Hom MA, Christensen K, Keane TM, Marx BP, Björngvinsson T. Psychometric  
713 properties of the Depressive Symptom Index-Suicidality Subscale (DSI-SS) in an adult  
714 psychiatric sample. *Psychol Assess.* 2021;33(10):987.
- 715 72. Spielberger CD. State-trait anxiety inventory for adults. Published online 1983.
- 716 73. Reiss S, Peterson RA, Gursky DM, McNally RJ. Anxiety sensitivity, anxiety frequency and the  
717 prediction of fearfulness. *Behav Res Ther.* 1986;24(0005-7967 (Print)):1-8.
- 718 74. Carleton RN, Duranceau S, Shulman EP, Zerff M, Gonzales J, Mishra S. Self-reported  
719 intolerance of uncertainty and behavioural decisions. *J Behav Ther Exp Psychiatry.*  
720 2016;51:58-65.

- 721 75. Mogg K, Garner M, Bradley BP. Anxiety and orienting of gaze to angry and fearful faces. *Biol*  
722 *Psychiatry*. 2007;76(0301-0511 (Print)):163-169.
- 723 76. Frewen PA, Dozois DJ, Joanisse MF, Neufeld RW. Selective attention to threat versus  
724 reward: Meta-analysis and neural-network modeling of the dot-probe task. *Clin Psychol*  
725 *Rev*. 2008;28(2):307-337.
- 726 77. Lewis MD, Lamm C, Segalowitz SJ, Stieben J, Zelazo PD. Neurophysiological correlates of  
727 emotion regulation in children and adolescents. *J Cogn Neurosci*. 2006;18(3):430-443.
- 728 78. Gillespie SM, Lee J, Williams R, Jones A. Psychopathy and response inhibition: A meta-  
729 analysis of go/no-go and stop signal task performance. *Neurosci Biobehav Rev*. Published  
730 online 2022:104868.
- 731 79. Gehring WJ, Willoughby AR. The medial frontal cortex and the rapid processing of monetary  
732 gains and losses. *Science*. 2002;295(5563):2279-2282.
- 733 80. van MB, Wiggert N, Wicker I, Lissek S. Maladaptive behavioral consequences of conditioned  
734 fear-generalization: a pronounced, yet sparsely studied, feature of anxiety pathology. *Behav*  
735 *Res Ther*. 2014;57(1873-622X (Electronic)):29-37. doi:10.1016/j.brat.2014.03.009
- 736 81. MacCallum RC, Browne MW, Sugawara HM. Power analysis and determination of sample  
737 size for covariance structure modeling. *Psychol Methods*. 1996;1(2):130.
- 738 82. Cox RW. AFNI: software for analysis and visualization of functional magnetic resonance  
739 neuroimages. *Comput Biomed Res*. 1996;29(3):162-173.
- 740 83. Kaczurkin AN, Burton PC, Chazin SM, et al. Neural Substrates of Overgeneralized  
741 Conditioned Fear in PTSD. *Am J Psychiatry*. 2016;(1535-7228  
742 (Electronic)):appiajp201615121549.

744 **Authors' Contributions**

745 Melissa Polusny was responsible for the overall conception and design of the study and  
746 led manuscript writing.

747 Craig Marquardt made substantial contributions to the acquisition of data and revising  
748 the manuscript critically.

749 Shelly Hubbling made substantial contributions to the acquisition of data for the study,  
750 reviewing the manuscript.

751 Emily Hagel Campbell made substantial contributions to analysis and interpretation of  
752 data, reviewing the manuscript.

753 Paul Arbisi made substantial contributions to the acquisition of data and revising the  
754 manuscript critically.

755 Nicholas Davenport made substantial contributions to the acquisition of data and  
756 revising the manuscript critically.

757 Kelvin Lim made substantial contributions to the acquisition of data and revising the  
758 manuscript critically.

759 Shumel Lissek made substantial contributions to the acquisition of data and revising the  
760 manuscript critically.

761 Jonathan Schaefer contributed substantially revising the manuscript critically.

762 Scott Sponheim made substantial contributions to the acquisition of data and revising  
763 the manuscript critically.

764 Ann Masten contributed to the conception and design of the study, revising the  
765 manuscript critically.

766 Siamak Noorbaloochi contributed to the conception and design of the study, analysis  
767 and interpretation of data, and revising the manuscript critically.

768 All authors have provided final approval of the manuscript for submission.

## 769 **Funding Statement**

770 This work was supported by the National Center for Complementary and Integrative  
771 Health of the National Institutes of Health grant number UH3AT009651.

## 772 **Competing Interests Statement**

773 The authors have no conflicts of interest.

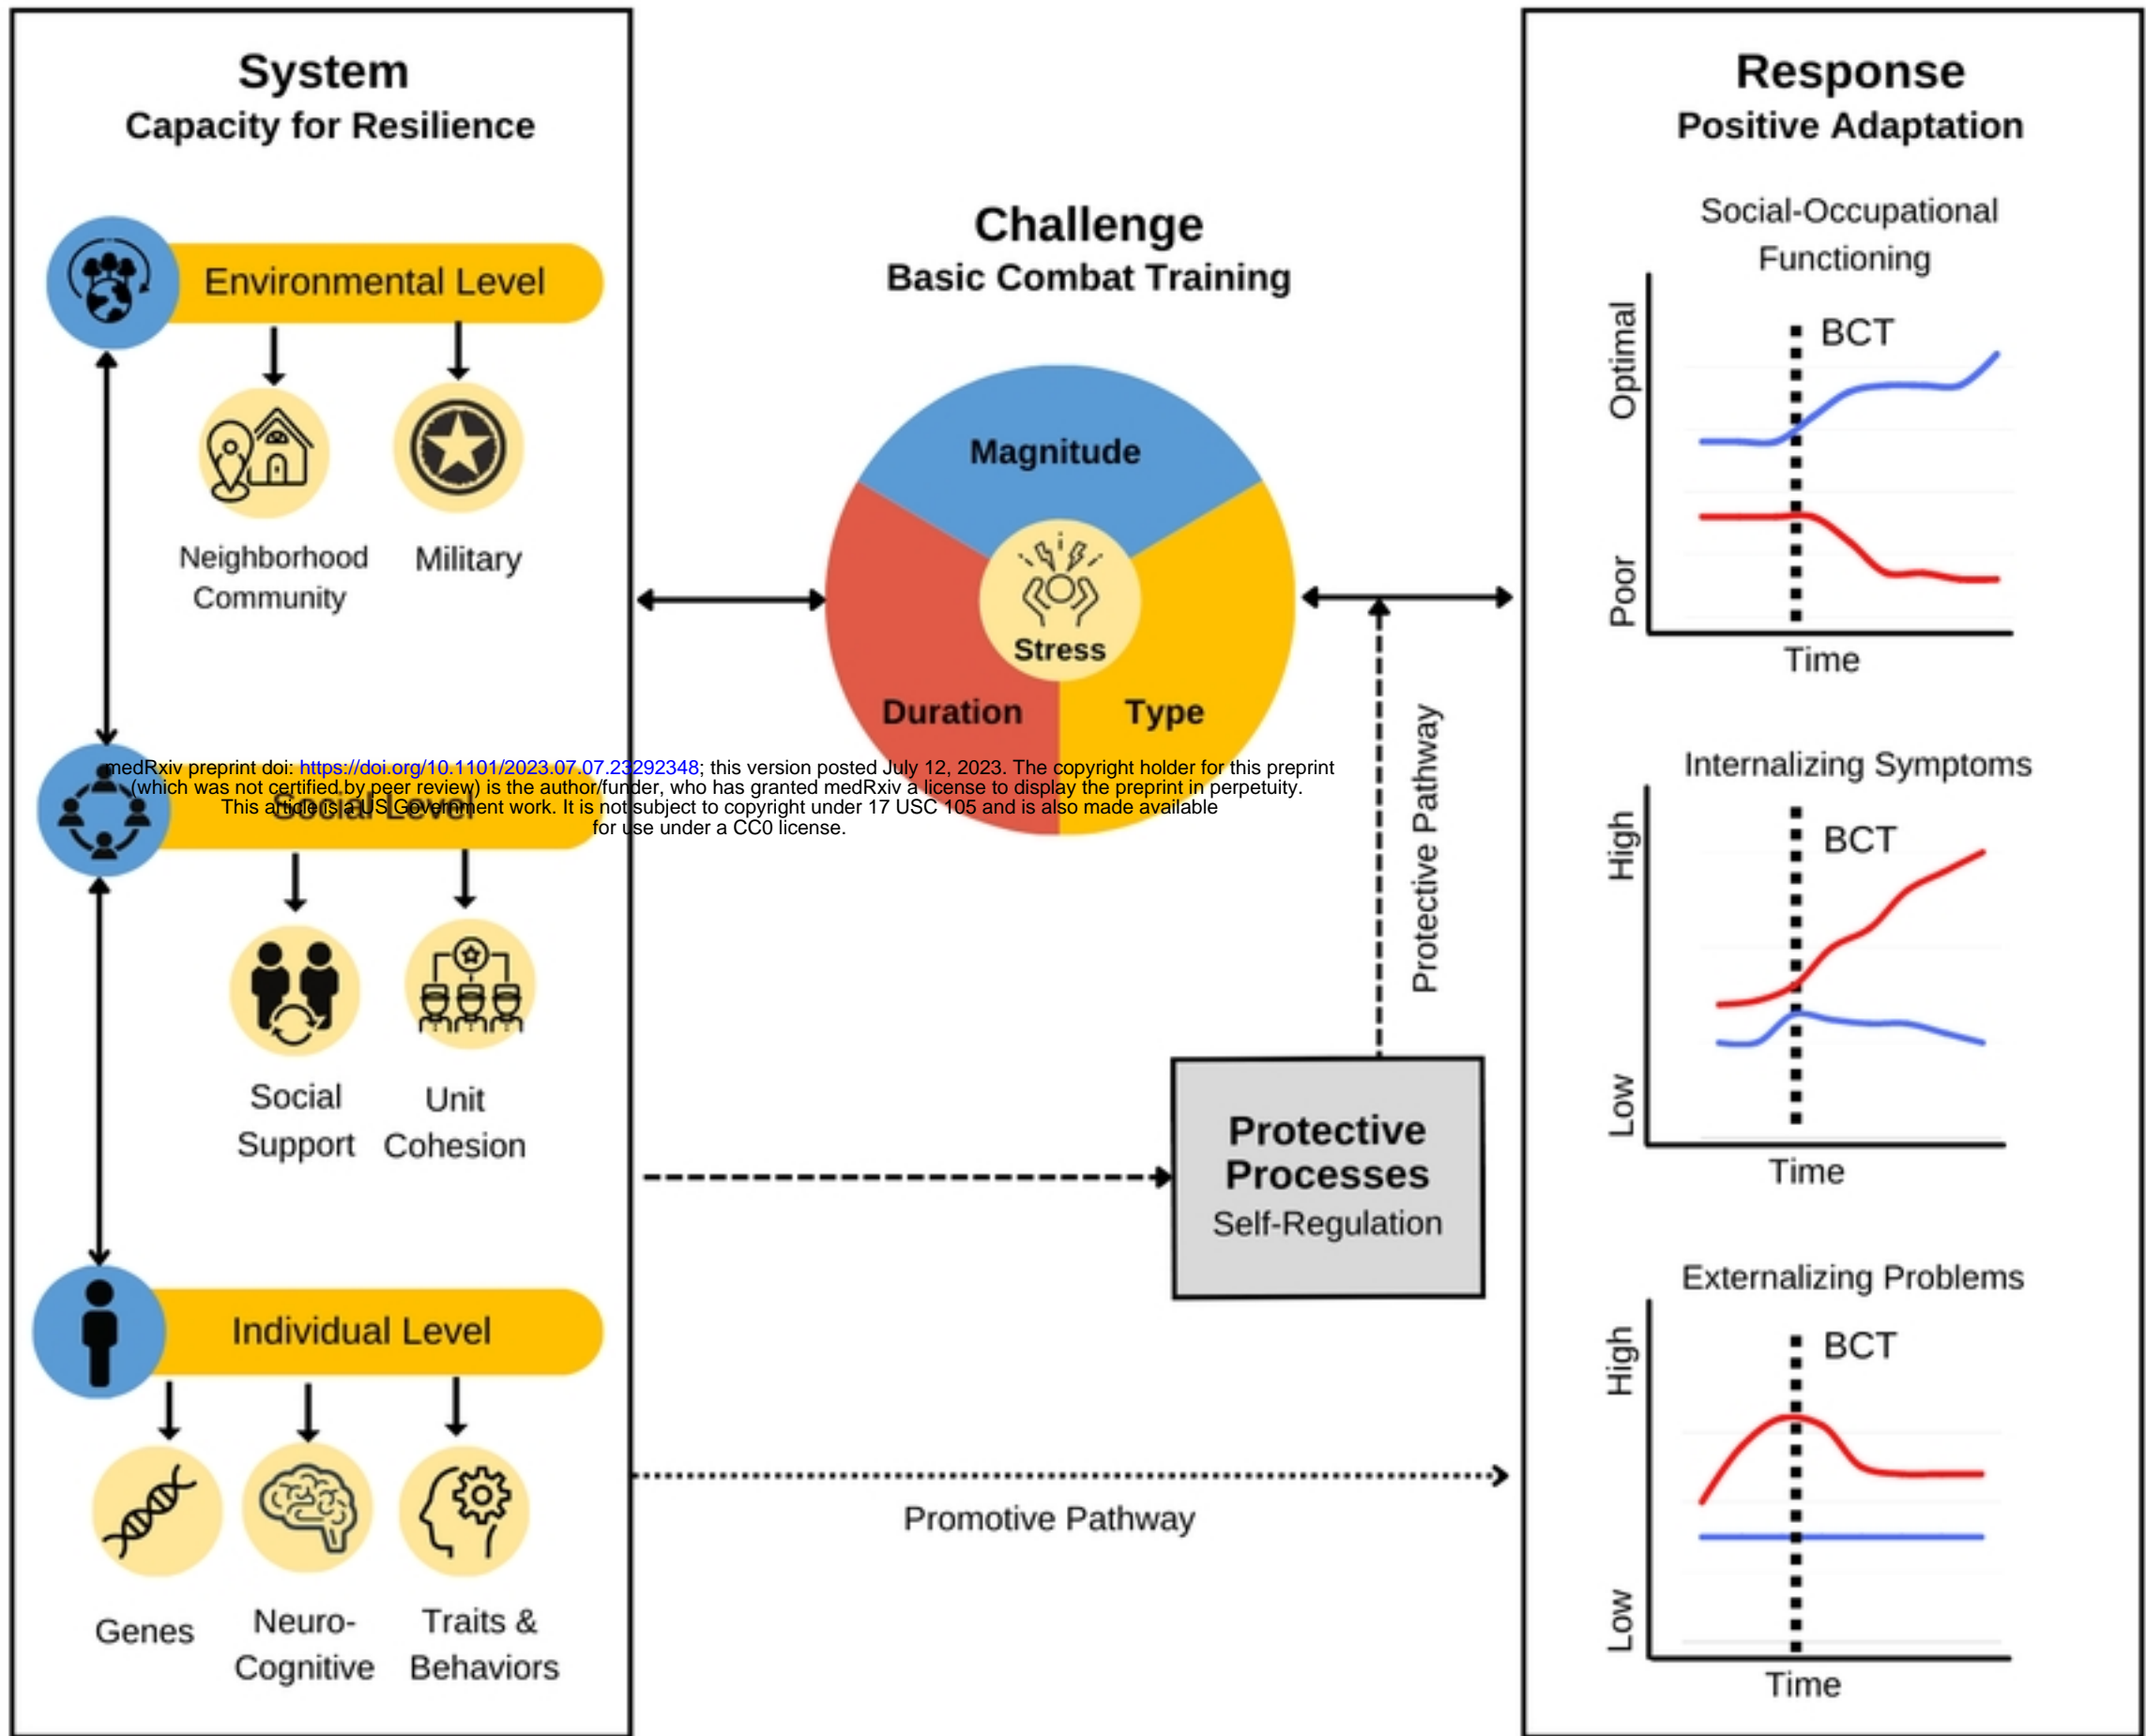

Figure 1

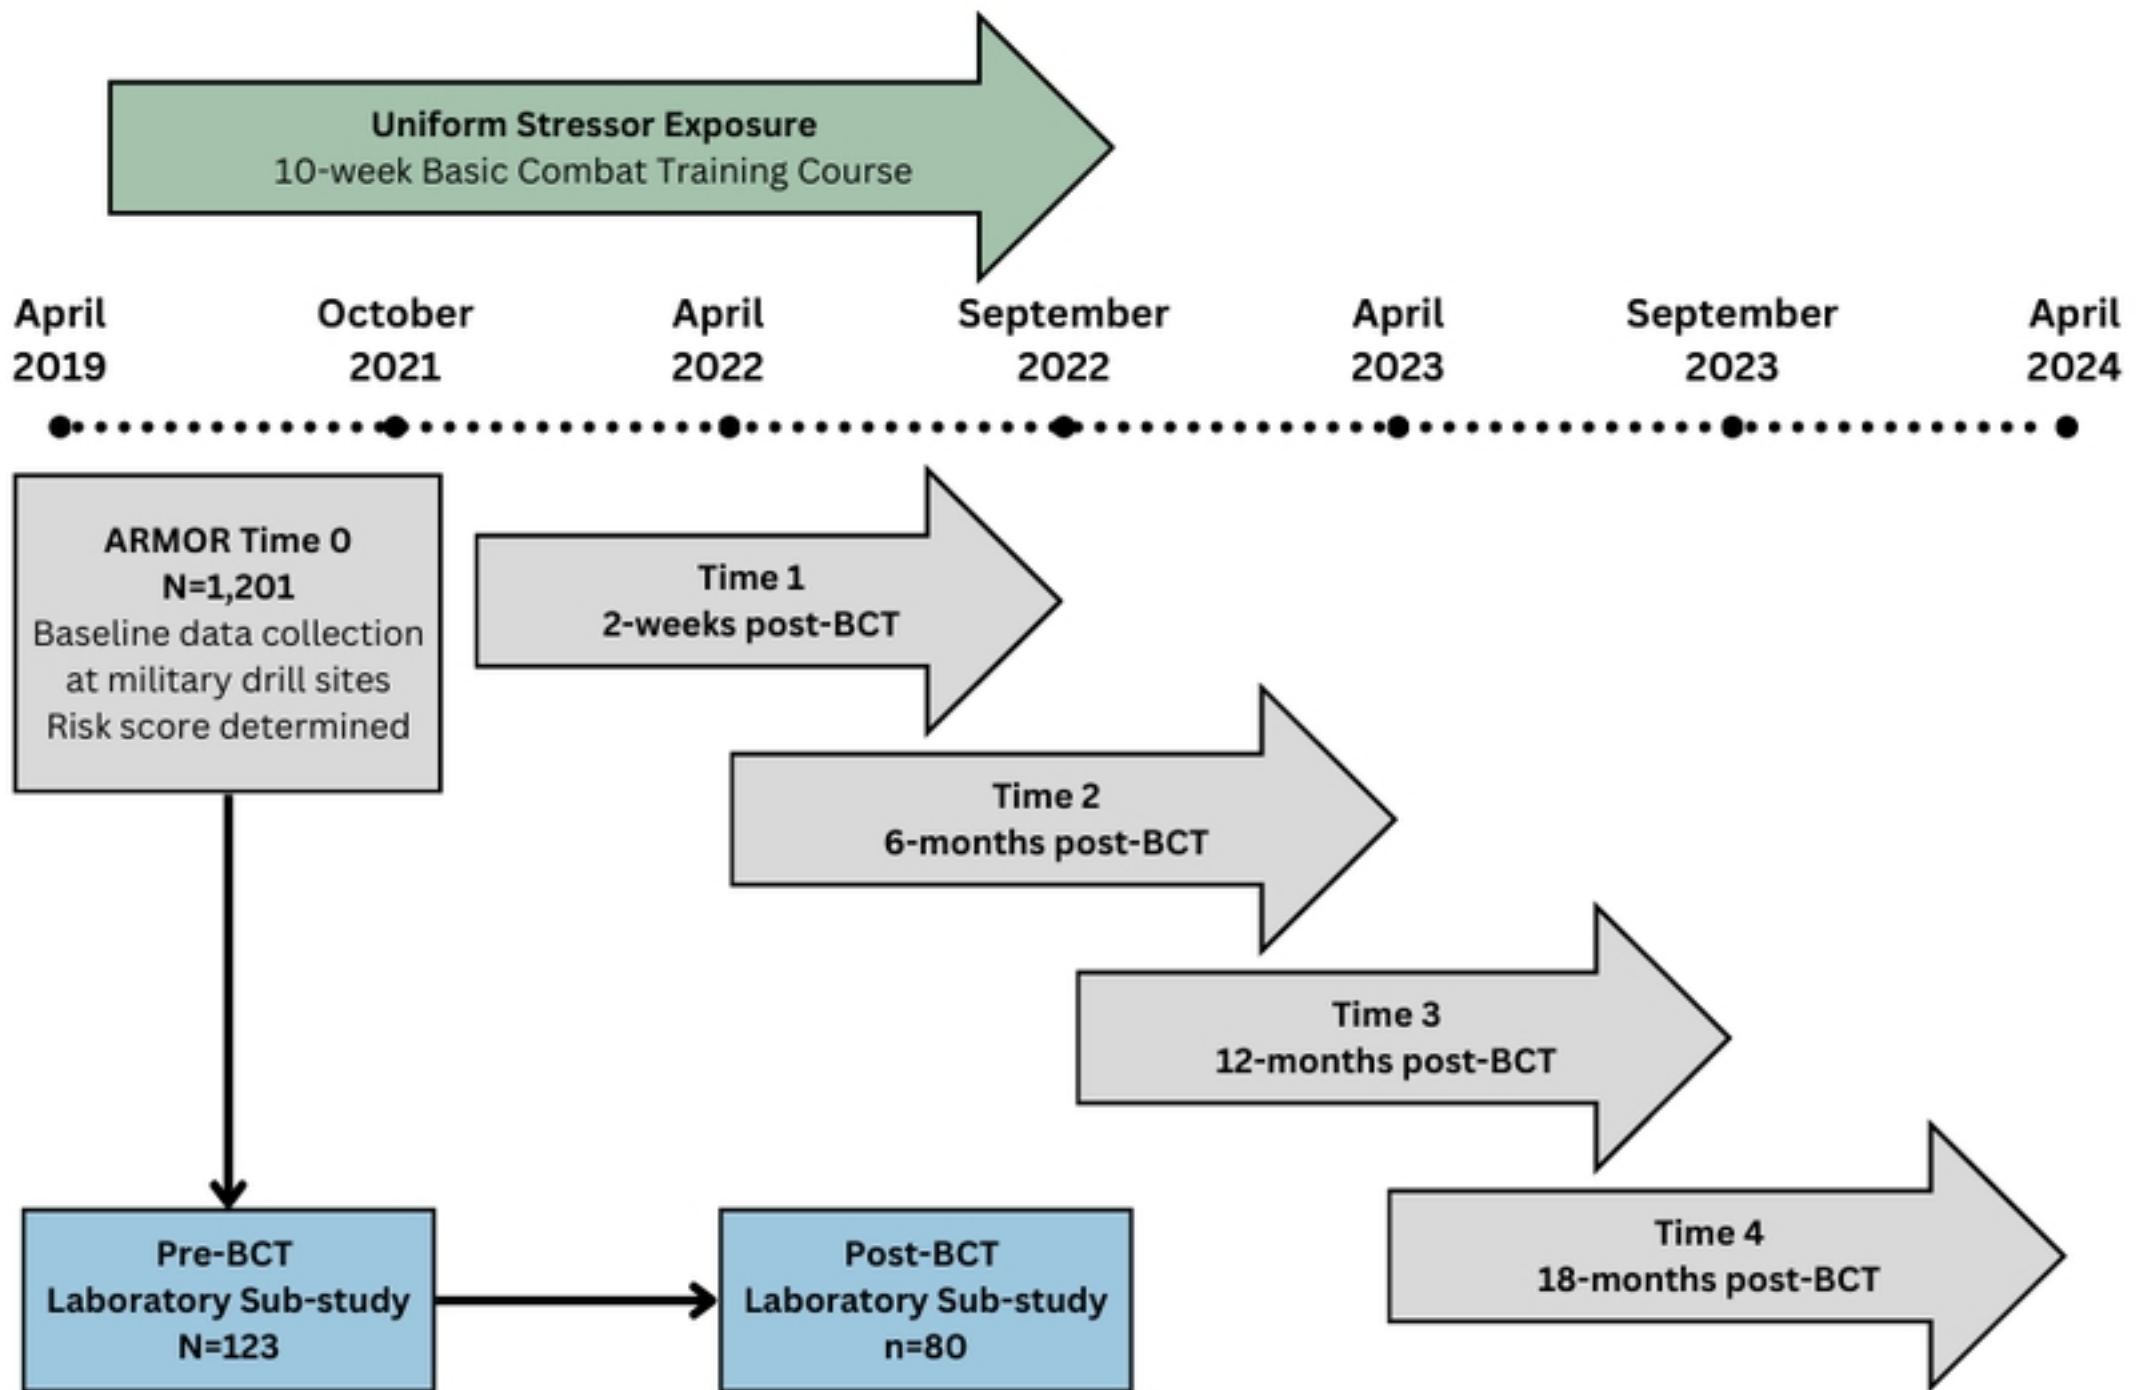

Figure 2
